# Unraveling the mystery behind the short-day-specific flowering of tobacco cultivar Maryland Mammoth

Marius M. Zimmermann<sup>1§</sup>, Lena Grundmann<sup>2§</sup>, Andrea Känel<sup>1</sup>, Axel Schwarze<sup>1+</sup>, David R. Wiedmann<sup>2+</sup>, Jost Muth<sup>3</sup>, Richard M. Twyman<sup>4</sup>, Dirk Prüfer<sup>1,2</sup> and Gundula A. Noll<sup>1,2\*</sup>

<sup>1</sup>University of Münster, Institute of Plant Biology and Biotechnology, Schlossplatz 8, 48143 Münster, Germany,

<sup>2</sup>Fraunhofer Institute for Molecular Biology and Applied Ecology IME, Schlossplatz 8, 48143 Münster, Germany,

<sup>3</sup>Fraunhofer Institute for Molecular Biology and Applied Ecology IME, Forckenbeckstraße 6, 52074 Aachen, Germany, and

<sup>4</sup>TRM Ltd, PO Box 493, Scarborough, YO11 9FJ, United Kingdom

<sup>§</sup>These authors have contributed equally to this work.

\*For correspondence: Gundula A. Noll; Schlossplatz 8, 48143 Münster; Tel: +492518324843; gnoll@uni-muenster.de

+M. Zimmermann, A. Schwarze and D. Wiedmann were affiliated with WWU IBBP/Fraunhofer IME at the time the work was completed.

Authors' email addresses:

mariuszimmermann@gmx.net; lena.grundmann@ime.fraunhofer.de; a.kaenel@uni-muenster.de; axel.schwarze@uni-muenster.de; david-wiedmann@t-online.de; jost.muth@ime.fraunhofer.de; richard@twymanrm.com; dpruefer@uni-muenster.de; gundula.noll@ime.fraunhofer.de

running title: NtFT5 mutation and short-day specific flowering in tobacco

Date of submission:

Number of tables: 0

Number of figures: 4

Word count: 4.399 (Introduction 830; Results 2.310; Discussion 1.143; Supplementary data 99, Acknowledgements 17)

Number of Supplementary figures/tables: 6/1

## Highlight

The previously unexplained gigantism of Maryland Mammoth tobacco is caused by a truncated major floral activator protein that results in weaker activation and the inability to flower under long-day conditions.

## Abstract

Flowering in day-neutral tobacco (*Nicotiana tabacum*) plants requires the photoperiod-dependent expression of members of the FLOWERING LOCUS T (FT)-like clade of phosphatidylethanolamine-binding proteins. FT-like floral activators and inhibitors compete for interaction with FD proteins to shift from vegetative to reproductive growth. In the short-day (SD) cultivar Maryland Mammoth (MM), vegetative growth persists under long-day (LD) conditions, generating unusually tall plants. We found that the major floral inducer under long-days (NtFT5) was expressed in MM and that *NtFT5* overexpression induced flowering in MM plants under LD conditions. However, sequence analysis revealed a 2-bp deletion near the 3' end of *NtFT5* in MM plants resulting in a truncated C-terminus with an altered amino acid sequence. We found that the truncated NtFT5<sub>MM</sub> protein was still able to interact with tobacco FD proteins. However, constitutive overexpression under LD conditions in SD-specific flowering tobacco plants showed that NtFT5<sub>MM</sub> is a weaker floral inducer than NtFT5. Our data indicate that the truncation does not impair the stability of the NtFT5<sub>MM</sub> protein but affects its binding affinity for NtFD1, probably resulting in the weaker expression of target genes. Our results therefore provide a potential explanation for the MM gigantism phenotype first observed more than 100 years ago.

**Keywords and Abbreviations:** flower development, FLOWERING LOCUS T, Maryland Mammoth, *Nicotiana tabacum*, non-flowering phenotype, PEBP family, photoperiodism

FLOWERING LOCUS T (FT), long-day (LD), Maryland Mammoth (MM), short-day (SD)

## Introduction

The transition from vegetative to reproductive development in flowering plants requires a precisely timed response to multiple endogenous and exogenous factors. In many plant species, a certain day length is required for floral induction. This perception of light and dark, and the subsequent adaptation, is known as photoperiodism, and plants can be assigned to one of three groups on this basis: short-day (SD), long-day (LD) and day-neutral. One of the first experiments addressing photoperiodism involved the tobacco (*Nicotiana tabacum*) cultivar Maryland Mammoth (MM), which does not flower under LD conditions and therefore grows unusually tall (Garner and Allard, 1920). Normally, tetraploid *N. tabacum* displays day-neutral flowering behavior. Many theories were proposed to explain the unanticipated obligate SD flowering of MM (including poor nutrition and

transplant shock) before experiments confirmed that photoperiodic conditions were responsible for the LD-specific gigantism phenotype (Garner and Allard, 1920).

Since these early studies, the regulation of photoperiodic flowering has been investigated in a number of plant species, in many cases revealing that permissive photoperiodic conditions generate a mobile signal (florigen) that mediates the switch from vegetative to reproductive growth (for review, see Wickland and Hanzawa, 2015). It is now accepted that the FLOWERING LOCUS T (FT)-like protein family is a major part of that signal (for review, see Turck *et al.*, 2008). In many plants, FT is produced in the leaves and transported via the phloem to the shoot apical meristem (SAM), where it interacts with the bZIP transcription factor FD to activate the floral transition (Abe *et al.*, 2005; Wigge *et al.*, 2005; Corbesier *et al.*, 2007; Tamaki *et al.*, 2007).

FT belongs to the phosphatidylethanolamine-binding protein (PEBP) family of developmental regulators, which are conserved in all eukaryotic organisms (Schoentgen and Jollès, 1995; Bradley *et al.*, 1996; Banfield *et al.*, 1998; Karlgren *et al.*, 2011). Whereas FT proteins are generally floral activators, PEBPs from the TERMINAL FLOWER1 (TFL1)-like clade are floral inhibitors that maintain the inflorescence meristem (Bradley *et al.*, 1996; Kobayashi *et al.*, 1999). Interestingly, the *FT* gene family in some plants has undergone expansion and neofunctionalization, with some members evolving into floral inhibitors (Pin *et al.*, 2010; Harig *et al.*, 2012; Wickland and Hanzawa, 2015). For example, two antagonistic FT homologs have been identified in sugar beet (*Beta vulgaris*), where BvFT1 acts as a floral inhibitor by repressing the floral activator BvFT2 at the transcriptional level (Pin *et al.*, 2010). In day-neutral tomato plants (*Solanum lycopersicum*), flowering is regulated by the expression of four *FT*-like genes encoding the floral inhibitors SISP5G, SISP5G2 and SISP5G3, and the floral activator SISP3D. The *SISP3D* gene is expressed similarly under LD and SD conditions, whereas *SISP5G* is predominantly expressed under LD conditions, and *SISP5G2* and *SISP5G3* are predominantly expressed under SD conditions. Flower development in day-neutral tomato is therefore regulated by the differential photoperiodic expression of multiple *FT*-like genes (Molinero-Rosales *et al.*, 2004; Lifschitz *et al.*, 2006; Cao *et al.*, 2015).

The tobacco genome also encodes multiple FT homologs, some of which (NtFT1–NtFT3) are floral inhibitors whereas others (NtFT4 and NtFT5) are floral activators (Harig *et al.*, 2012; Beinecke *et al.*, 2018; Wang *et al.*, 2018). *NtFT1–NtFT4* are expressed predominantly under SD conditions whereas *NtFT5* is expressed under both SD and LD conditions, and unlike *FT* genes from other species none of the *NtFT* genes show a circadian expression profile (Harig *et al.*, 2012; Beinecke *et al.*, 2018). Silencing the floral activator gene *NtFT5* by RNA interference significantly delayed flowering under LD conditions, whereas knocking out the *NtFT5* gene using CRISPR/Cas9 rendered the mutants completely unable to flower under LD conditions, indicating that NtFT5 is a major floral inducer during long days (Beinecke *et al.*, 2018; Schmidt *et al.*, 2020). Three functional FD homologs have also been identified

in tobacco (NtFD1, NtFD3 and NtFD4) and they interact with tobacco FT proteins (Beinecke *et al.*, 2018). Furthermore, the *NtFT4* and *NtFT2* genes (encoding an activator and inhibitor, respectively) are expressed at similar levels under SD conditions, and the proteins show dose-dependent effects on flowering, which indicates they compete at the protein level for FD binding rather than using the mutual transcriptional regulation strategy described in sugar beet and potato (Pin *et al.*, 2010; Abelenda *et al.*, 2016; Beinecke *et al.*, 2018). Indeed, NtFD1 preferentially interacts with the floral activator NtFT4 rather than the inhibitor NtFT2 (Beinecke *et al.*, 2018). Taken together, these results show that although tobacco is a day-neutral plant, flowering is in part regulated by the photoperiod-dependent expression of different *FT* genes (Harig *et al.*, 2012; Beinecke *et al.*, 2018). Here, we isolated and characterized the *NtFT5* gene in the SD cultivar MM and carried out overexpression studies to investigate its impact on flowering in MM compared to the day-neutral cultivar Hicks, which is considered to be isogenic to MM except at the MM locus (Smith and McDaniel, 1992). Our results provide insight into the molecular basis of a phenomenon that has been observed but not understood for more than a century (Amasino, 2013).

## Materials and Methods

### Plant materials and cultivation conditions

Seeds of *N. tabacum* cv. Hicks, *N. tabacum* cv. Maryland Mammoth (IPK Gatersleben, Germany) and *N. tabacum* SR1Δ*NtFT5* were sown in soil and cultivated in the greenhouse under LD conditions (16-h photoperiod, artificial light switched on if natural light fell below 700  $\mu\text{mol m}^{-2} \text{s}^{-1}$ , 22–25 °C under light, 20–25 °C in the dark) or in phytotrons under SD conditions (8-h photoperiod, 200  $\mu\text{mol m}^{-2} \text{s}^{-1}$ , 25 °C under light, 22 °C in the dark). Medial leaves were harvested 6 and 10 weeks after seed sowing (WASS) under LD and SD conditions and each sample comprised tissue pooled from three plants. Transgenic tobacco plants were generated by leaf disc transformation (Horsch *et al.*, 1985) using *Agrobacterium tumefaciens* strain LBA4404 (Hoekema *et al.*, 1983) and were regenerated on MS medium (Murashige and Skoog, 1962) containing 25 mg/L hygromycin for sterile selection under LD conditions (100  $\mu\text{mol m}^{-2} \text{s}^{-1}$ , 23 °C). After root formation, independent transgenic lines were transferred to the greenhouse and grown in soil. T<sub>1</sub> seedlings were cultivated under sterile conditions on selective medium as above. Seedlings were either harvested for expression and western blot analysis or up to 10 individuals were transferred to the greenhouse for phenotypic analysis.

### Gene expression studies

Leaf or seedling samples were snap frozen in liquid nitrogen and stored at –80°C. Total RNA was extracted using the innuPREP Plant RNA kit (Analytik Jena, Jena, Germany) and residual genomic DNA was removed using the Turbo DNA-free kit (Thermo Fisher Scientific, Waltham, MA, USA). First-strand cDNA was synthesized by reverse transcription using PrimeScript RT Master Mix (Takara Bio Group,

Saint-Germain-en-Laye, France). We carried out qPCR analysis using the CFX 96 Real-Time system (Bio-Rad, Munich, Germany) on a C1000 Touch Thermal Cycler. We mixed 0.1 µl template cDNA and 500 nM of each primer (Supplementary Table S1) with KAPA SYBR Fast qPCR Master Mix (Merck, Darmstadt, Germany). Each reaction comprised an initial denaturation step for 3 min at 95 °C, followed by 40 cycles of denaturation at 95 °C for 3 s and annealing/extension at primer-specific temperatures for 30 s (Supplementary Table S1). Melt curve analysis was carried out to confirm the specificity of the amplicon (5 s, 58–95 °C,  $\Delta T = 0.5$  °C). The target transcripts and reference *NtEF-1α* (Schmidt and Delaney, 2010) were analyzed in triplicate, and the quantification cycle ( $C_q$ ) values of technical replicates were averaged. The NTC (non-template control) and NRT (non-reverse-transcribed control) were analyzed in duplicate. Data were analyzed using Bio-Rad CFX Manager v3.1. The expression values of *NtFT4* and *NtFT5* were determined as previously described (Livak and Schmittgen, 2001).

## Cloning experiments

The *NtFT5* and *AtFT* coding sequences were amplified from tobacco cDNA (*N. tabacum* cv. Hicks and cv. MM) and *Arabidopsis thaliana* cDNA (cv. Col-0), respectively, using the primers listed in Supplementary Table S1. The overexpression constructs were prepared by digesting the *NtFT5* and *NtFT5<sub>MM</sub>* amplicons with the appropriate restriction enzymes and inserting them into vector pRT104 containing the CaMV 35S promoter and terminator (Töpfer *et al.*, 1987). The entire expression cassette was then excised with HindIII and ligated into vector pBinHyg (Bevan, 1984).

For the bimolecular fluorescence complementation (BiFC) assay, the *AtFT*, *NtFT5* and *NtFT5<sub>MM</sub>* coding sequences were amplified using the primers listed in Supplementary Table S1, digested with the appropriate restriction enzymes and inserted into vector pENTR4 (Invitrogen, Karlsruhe, Germany). The pENTR4 constructs were then transferred to pBatTL NmRFP-ccdB by LR recombination using the Gateway LR Clonase Enzyme mix (Invitrogen). Split mRFP destination vectors containing *NtFD1*, *NtFD3*, *NtFD4* and *NtFD1<sub>SAAPF</sub>* were already available (Beinecke *et al.*, 2018). Destination vectors were kindly provided by Dr Guido Jach and Dr Joachim Uhrig, MPI Cologne, Germany (Müller *et al.*, 2010). For the multicolor BiFC (mcBiFC) assay, vectors P35S:SCN-NtFT2:Tnos-Spacer and P35S:VN-NtFT2:Tnos pBluescriptII (Beinecke *et al.*, 2018) were digested with StuI/BsrGI and ligated with the *NtFT5* and *NtFT5<sub>MM</sub>* coding sequences to generate vectors pBS-SCN-NtFT5-Sp, pBS-SCN-NtFT5<sub>MM</sub>-Sp, pBS-VN-NtFT5 and pBS-VN-NtFT5<sub>MM</sub>. To generate dual expression cassettes, P35S:VN-NtFT5<sub>(MM)</sub> was excised with ClaI/DraIII and transferred to pBS-SCN-NtFT5<sub>(MM)</sub>-Sp to create four intermediate vectors. The dual expression cassettes were excised using PmeI/BamHI and transferred to plab12.1 (linearized with XmnI/BamHI) to create four binary vectors named plab-SCN-NtFTx-Sp-VN-NtFTx. To generate the SCC-NtFD1 fusion, SCC-HA was amplified using the primers listed in Supplementary Table S1, digested with Sall/BamHI and transferred to pRT104 (linearized with XhoI/BamHI). The NtFD1 coding sequence was

amplified, digested with BamHI/XbaI and transferred to pRT-SCC-HA (linearized with BamHI/XbaI). The P35S:SCC-NtFD1:T35S cassette was excised with HindIII and transferred to plab12.1 to create the binary vector plab-SCC-NtFD1.

The overexpression constructs for *NtFT5*<sub>G170W</sub> and *NtFT5*<sub>MM W170G</sub> were prepared by digesting the *NtFT5*<sub>G170W</sub> and *NtFT5*<sub>MM W170G</sub> amplicons (generated using the primers listed in Supplementary Table S1) with the appropriate restriction enzymes and inserting them into vector pRT104, containing the CaMV 35S promoter and terminator (Töpfer *et al.*, 1987). The entire expression cassette was then excised with HindIII and transferred to vector plab12.10 (Post *et al.*, 2014).

All constructs for transient and stable expression were introduced into the appropriate strain of *A. tumefaciens* by electroporation.

## Western blotting

Total protein extracted from 3-week-old transgenic and wild-type seedlings was boiled with Laemmli buffer (50% glycerol, 10% SDS, 0.25 M Tris-HCl pH 6.8, 5% 2-mercaptoethanol) containing 0.05% bromophenol blue and was separated by SDS-PAGE on a 12% polyacrylamide gel before electroblotting onto a nylon membrane. NtFT5 protein was detected using an anti-FT antibody (AS06198, Agrisera) diluted 1:1000.

## Grafting experiments

SR1 wild-type and 35S:*NtFT5*<sub>(MM)</sub>//SR1Δ*NtFT5* transgenic plants were cultivated in the greenhouse until floral buds became visible. Non-flowering SR1Δ*NtFT5* scions were then grafted onto each stock (n = 3) before further cultivation in the greenhouse. Emerging leaves of the SR1Δ*NtFT5* scions were removed regularly to enhance the source-sink gradient.

## (Multicolor) bimolecular fluorescence complementation analysis

Transient expression was carried out by co-infiltrating the leaves of 3–4-week-old *N. benthamiana* plants (grown under LD conditions) with *A. tumefaciens* strain GV3101 pMP90 carrying the appropriate expression constructs for FT (*AtFT*, *NtFT5*, *NtFT5*<sub>MM</sub>, *NtFT5*<sub>FN\*</sub>, *NtFT5*<sub>FNC\*</sub>, *NtFT5*<sub>R61G</sub> or *NtFT5*<sub>R129A</sub>) and FD (*NtFD1*, *NtFD1*<sub>SAAPF</sub>, *NtFD3* or *NtFD4*) and *A. tumefaciens* strain C58C1 carrying the pCH32 helper plasmid encoding virulence genes and the pBIN61 plasmid encoding the tomato bushy stunt virus RNA silencing suppressor protein p19 (Hamilton *et al.*, 1996; Walter *et al.*, 2004; Voinnet *et al.*, 2003). The expression and helper strains were infiltrated at OD<sub>600nm</sub> 1 and 0.3, respectively. We monitored mRFP fluorescence by confocal laser scanning microscopy (CLSM) using a TCS SP5 X microscope (Leica Microsystems, Wetzlar, Germany) at excitation and emission wavelengths of 549 and 569–629 nm, respectively. For mBiFC (Hu and Kerppola, 2003; Waadt *et al.*, 2008), the SCN/VN expression strains, the SCC-NtFD1 expression strain and the helper strain were infiltrated at OD<sub>600 nm</sub> = 0.5, 0.33 and 0.3,



respectively. Plants were cultivated under continuous light for 3–4 days, and leaf discs were screened for fluorescent cells in the abaxial epidermis. Fluorescence was observed by CLSM using a Leica STELLARIS 8 microscope (Leica Microsystems) at excitation/emission wavelengths of 458/470–490 nm for S(CFP) 3A and 488/505–525 nm for the VN/SCC chimera. Nuclear fluorescence was quantified using Leica LAS AF software and the data were analyzed using Origin 2020.

## Results

### Expression of endogenous floral activator genes *NtFT4* and *NtFT5* in SD cultivar MM and day-neutral cultivar Hicks

Flower development is induced under both LD and SD conditions in most tobacco cultivars, but cultivar MM flowers only under SD conditions (Fig. 1A–H). To determine whether the LD-specific non-flowering phenotype of MM reflects the silencing of *NtFT5*, the major floral activator under LD conditions (Harig *et al.*, 2012; Beinecke *et al.*, 2018; Schmidt *et al.*, 2020), we compared the expression of *NtFT5* in MM and a day-neutral tobacco cultivar (Hicks) by quantitative real-time PCR (qPCR) (Fig. 1I–J). We found that *NtFT5* was expressed in both cultivars under LD and SD conditions and the expression profiles were similar in each cultivar when matched for day length and the time point of harvest (6 or 10 WASS). *NtFT5* mRNA was generally less abundant under LD than SD conditions in both cultivars, and under SD conditions *NtFT5* was expressed at basal levels 6 WASS but was induced during floral transition (10 WASS). The main difference between the cultivars was that *NtFT5* mRNA levels were higher in Hicks than MM under LD conditions at the 6 WASS time point. However, *NtFT5* mRNA levels increased between 6 and 10 WASS under LD conditions in MM whereas we detected almost no difference in *NtFT5* mRNA levels between 6 and 10 WASS under LD conditions in Hicks. The increase in *NtFT5* mRNA levels between 6 and 10 WASS was less steep in MM under LD conditions than SD conditions. *NtFT5* mRNA levels were nearly identical in both cultivars 10 WASS under LD conditions, but Hicks flowered at this point whereas MM remained in the vegetative phase.

In addition to *NtFT5* the closely related gene *NtFT7* was identified in whole-genome shotgun contigs of the *N. tabacum* cultivars K326, TN90 and Basma Xanthi, and it promoted the flowering of *N. sylvestris* plants constitutively overexpressing this gene (Beinecke *et al.*, 2018). However, as previously described for cultivar SR1 (Beinecke *et al.*, 2018), *NtFT7* was not detected in the genomes of cultivars Hicks or MM (Supplementary Fig. S1). We also analyzed the expression of *NtFT4*, which encodes a floral activator that is predominantly expressed under SD conditions in cultivar SR1 (Harig *et al.*, 2012; Beinecke *et al.*, 2018). Our qPCR results showed that *NtFT4* was also predominantly expressed under SD conditions in cultivars Hicks and MM, and the mRNA levels increased during the reproductive phase. *NtFT4* mRNA was also detected under LD conditions, mainly at 10 WASS, and the levels were comparable to those detected under SD conditions 6 WASS (Fig. 1I–J). Interestingly, flowering was

delayed by a week in MM compared to Hicks under SD conditions, even though *NtFT4* and *NtFT5* were expressed at similar levels in both cultivars.

### Floral induction in transgenic MM and Hicks plants expressing *NtFT5*

Having established that *NtFT5* is similarly expressed in both cultivars, we set out to determine whether there is a functional deficiency in the *NtFT5* gene in MM and whether MM has the propensity to flower under LD conditions when provided with a fully functional sequence. We therefore isolated the *NtFT5* coding sequence from Hicks (because this variety flowers under LD conditions) and transformed MM plants (and Hicks plants as a control) with the 35S:*NtFT5*<sub>Hicks</sub> cassette. The constitutive expression of the *NtFT5*<sub>Hicks</sub> gene caused a profound early flowering phenotype in both cultivars (Fig. 2A,B). We found that 50% of the lines began flowering in tissue culture and failed to form roots (four 35S:*NtFT5*<sub>Hicks</sub> MM lines and five 35S:*NtFT5*<sub>Hicks</sub> Hicks lines), but the other 50% could be transferred to the greenhouse and generated seeds. Expression analysis by qPCR revealed that transgenic lines from both cultivars accumulated ~10<sup>4</sup>-fold more *NtFT5* mRNA than the vector control (Fig. 2C,D). These results demonstrate that the *NtFT5*<sub>Hicks</sub> gene can induce flowering during the early stages of development even under LD conditions when overexpressed in the SD cultivar MM.

### Functional characterization of *NtFT5*<sub>MM</sub>

The experiments described above showed that *NtFT5* expression is not suppressed in cultivar MM but that there appears to be a functional difference between the *NtFT5* genes in each cultivar. We therefore compared the *NtFT5*<sub>Hicks</sub> and *NtFT5*<sub>MM</sub> coding sequences. This revealed that the *NtFT5*<sub>Hicks</sub> coding sequence was identical to that previously reported for cultivar SR1 (Beinecke *et al.*, 2018). We therefore use the generic designation *NtFT5* hereafter when referring to the *NtFT5*<sub>Hicks</sub> gene and corresponding protein. In contrast, the *NtFT5*<sub>MM</sub> sequence featured a 2-bp deletion 29 bp upstream of the stop codon. The resulting frameshift mutation altered the remainder of the amino acid sequence and introduced a premature stop codon, shortening the protein sequence by six amino acids (Fig. 3A). We next attempted to confirm the ability of *NtFT5*<sub>MM</sub> to act as a floral promoter. We previously generated *NtFT5*-deficient SR1 plants (SR1Δ*NtFT5*) using the CRISPR/Cas9 system and they were unable to flower under LD conditions (Schmidt *et al.*, 2020). We therefore transformed these SR1Δ*NtFT5* plants with constructs expressing *NtFT5* or *NtFT5*<sub>MM</sub> under the control of the constitutive CaMV 35S promoter (Fig. 3B–D). Ten out of 13 35S:*NtFT5* transgenic plants showed a profound early flowering phenotype that failed to produce roots and thus could not be transferred to the greenhouse for the generation of seeds. In contrast, none of the 12 35S:*NtFT5*<sub>MM</sub> transgenic plants flowered in tissue culture but when transferred to the greenhouse after root induction they started flowering at a later developmental stage (Fig. 3B). We analyzed transgene expression in young leaf tissue by qPCR (the primers amplified the same 190-bp fragment in the coding sequence of *NtFT5* and *NtFT5*<sub>MM</sub>) and



detected higher *NtFT5<sub>MM</sub>* and *NtFT5* mRNA levels in the transgenic plants than in the SR1 vector control (Fig. 3D). Floral induction by *NtFT5<sub>MM</sub>* was investigated in more detail by studying these transgenic *N. tabacum* cv. SR1Δ*NtFT5* lines in the T<sub>1</sub> generation (Fig. 3E–H). We cultivated three independent transgenic lines each (n = 8–10) and one SR1 vector control line (n = 10) in the greenhouse under LD conditions and documented the late and early flowering phenotype for one representative transgenic line each in comparison to a vector control (Fig. 3E). Although *NtFT5<sub>MM</sub>* mRNA levels strongly increased compared to transgenic plants overexpressing *NtFT5* and the vector control (Fig. 3F), *NtFT5<sub>MM</sub>* overexpression did not induce early flowering in the SR1Δ*NtFT5* plants as already observed with primary transformants. Moreover, flowering was significantly delayed in all three 35S:*NtFT5<sub>MM</sub>*//SR1Δ*NtFT5* lines and the number of leaves increased significantly compared to the SR1 vector control (Fig. 3G,H). In comparison, all individuals of the three transgenic lines overexpressing *NtFT5* showed a profound early flowering phenotype, resulting in significantly fewer leaves and significantly fewer days until flowering compared to the SR1 vector control with endogenous *NtFT5* expression (Fig. 3G,H). This indicates that *NtFT5<sub>MM</sub>* only partially complements the non-flowering phenotype of SR1Δ*NtFT5* plants, showing that *NtFT5<sub>MM</sub>* is a weaker floral inducer than *NtFT5*.

To gain more insight into the mechanistic difference between *NtFT5* and *NtFT5<sub>MM</sub>*, we determined whether the truncated *NtFT5<sub>MM</sub>* protein was able to interact with the recently identified tobacco FD proteins (Beinecke *et al.*, 2018). To initiate floral development, FT interacts with FD in the SAM (Kardailsky *et al.*, 1999; Kobayashi *et al.*, 1999; Abe *et al.*, 2005; Wigge *et al.*, 2005) and similar FT/FD interactions have been described in tobacco (Beinecke *et al.*, 2018). We conducted BiFC assays in which the C-terminal portion of the fluorescent reporter protein mRFP was fused to the N-terminus of *NtFD1*, *NtFD3*, *NtFD4*, or *NtFD1* with a mutated STAPF motif (negative control *NtFD1<sub>SAAFP</sub>*), which does not interact with tobacco FTs due to a missing phosphorylation site (Beinecke *et al.*, 2018). The N-terminal portion of mRFP was fused to the N-terminus of *NtFT5<sub>MM</sub>*, *NtFT5*, the well-characterized *AtFT* as a positive control, and a truncated version of *NtFT5* lacking 15 amino acids (*NtFT5<sub>FN</sub>*) as a negative control (Supplementary Method S1). The CmRFP-FD proteins were coexpressed systematically with the NmRFP-FT proteins. As expected, CLSM revealed a nuclear fluorescent signal for *AtFT* with any of the three native *NtFD* proteins (Supplementary Fig. S2) but not when *NtFT5<sub>FN</sub>* was combined with these native *NtFDs* (Fig. 4A, Supplementary Fig. S2). Furthermore, nuclear fluorescence was detected when either *NtFT5<sub>MM</sub>* or *NtFT5* was present with any of the three native *NtFD* proteins (*NtFD1* is shown as a representative example in Fig. 4A, for the others see Supplementary Fig. S2), but not with *NtFD1<sub>SAAFP</sub>* (Fig. 4B). We confirmed the presence of the different mRFP-FT fusion proteins by western blot analysis (Supplementary Fig. S3).

Next, we determined whether the C-terminal truncation of *NtFT5<sub>MM</sub>* affects protein stability. Crude protein extracts of T<sub>1</sub> seedlings from three independent transgenic lines (same lines as in Fig. 3) and

SR1 wild-type seedlings as controls were used for western blotting. We detected NtFT5 and NtFT5<sub>MM</sub> using the AtFT-specific antibody only in crude protein extracts of transgenic seedlings overexpressing the corresponding NtFT. Specific signals were present for one 35S:NtFT5//SR1ΔNtFT5 line (L3), as well as two 35S:NtFT5<sub>MM</sub>//SR1ΔNtFT5 lines (L14 and L24, Fig. 4C), reflecting the expression level determined by qPCR (Fig. 3F). The band for NtFT5<sub>MM</sub> samples migrated further, reflecting its lower molecular weight due to the truncated C-terminus. This experiment demonstrated that a high transgene expression level produces enough protein for detection by western blot and that the truncated C-terminus of NtFT5<sub>MM</sub> does not appear to affect protein stability.

Next, we investigated whether the truncation of NtFT5<sub>MM</sub> impairs the transport of this protein via the phloem. We therefore grafted SR1ΔNtFT5 scions onto rootstocks of either 35S:NtFT5//SR1ΔNtFT5 or 35S:NtFT5<sub>MM</sub>//SR1ΔNtFT5 lines as well as wild-type control plants (n = 3 each). All SR1ΔNtFT5 scions grafted onto wild-type control stocks flowered 7–9 weeks after grafting, with 35–49 leaves/nodes produced on the scion (Fig. 4D). After approximately 11 weeks, one SR1ΔNtFT5 scion grafted onto 35S:NtFT5//SR1ΔNtFT5 stock, and two grafted onto 35S:NtFT5<sub>MM</sub>//SR1ΔNtFT5 stocks, showed floral-like structures, with 21 and 24/25 leaves/nodes produced on the scion, respectively (Fig. 4D). However, only 50% of these grafts showed floral transition of the SAM, and complete inflorescences (as induced by wild-type stocks) were not formed. Given that 35S:NtFT5//SR1ΔNtFT5 stocks produced many axillary shoots (which we removed regularly) this may have impaired source–sink transport to the scion. For the 35S:NtFT5<sub>MM</sub>//SR1ΔNtFT5 stocks, this might indicate a functionally impaired NtFT5<sub>MM</sub> protein. These results suggest that NtFT5<sub>MM</sub> is transported to the shoot apex like NtFT5 but floral transition mediated by 35S:NtFT5<sub>MM</sub>//SR1ΔNtFT5 stocks was slightly delayed compared to floral transition of the SR1ΔNtFT5 scion grafted onto a 35S:NtFT5//SR1ΔNtFT5 stock, again matching our earlier results that NtFT5<sub>MM</sub> is a weaker floral inducer.

Because the transport of NtFT5<sub>MM</sub> was apparently normal, we conducted mcBiFC assays to test the binding affinity of both NtFTs with NtFD1. Using this assay, we recently confirmed the lower binding affinity of floral repressor NtFT2 to NtFD1 compared to floral activator NtFT4 (Beinecke *et al.*, 2018). We therefore prepared two cassettes controlled by the CaMV 35S promoter for the expression of NtFT5 or NtFT5<sub>MM</sub> as N-terminal fusions with the N-terminal component of cyan fluorescent protein S(CFP)3A (SCN) together with an N-terminal fusion of NtFT5 or NtFT5<sub>MM</sub> with the N-terminal component of Venus (VN) (Supplementary Fig. S4). A construct in which the N-terminal portion of NtFD1 was fused to the C-terminal portion of S(CFP)3A (SCC) was carried by a separate bacterial strain. Interactions between SCN and SCC reconstitute S(CFP)3A, which emits blue fluorescence when excited, whereas chimeric association between VN and SCC emits green fluorescence. After agroinfiltration and the cultivation of *N. benthamiana* under constant light for 3 days, abaxial epidermal leaf cells were analyzed by CLSM and the nuclear signal intensity was measured. The co-expression of SCN-NtFT5 and

VN-NtFT5 with SCC-NtFD1, as well as SCN-NtFT5<sub>MM</sub> and VN-NtFT5<sub>MM</sub> with SCC-NtFD1, resulted in little difference between the blue and green signals and served as an equilibrium control with balanced competition (Fig. 4E and Supplementary Fig. S4). However, when SCN-NtFT5, VN-NtFT5<sub>MM</sub> and SCC-NtFD1 were co-expressed, a significant shift towards the blue signal of SCN/SCC was detected, whereas the co-expression of SCN-NtFT5<sub>MM</sub>, VN-NtFT5 and SCC-NtFD1 produced a dominant green VN/SCC signal. This indicates that NtFT5<sub>MM</sub> has a lower binding affinity than NtFT5 for NtFD1, and that NtFD1 preferably associates with NtFT5 because it is more competitive at the protein level than NtFT5<sub>MM</sub> with its truncated C-terminus.

Our results show that the C-terminal amino acid residues of NtFT5 fulfil an important role in floral transition. Arabidopsis mutants with the substitution G171E in the corresponding region have a late flowering phenotype (Koornneef *et al.*, 1991; Kardailsky *et al.*, 1999; Kobayashi *et al.*, 1999). In NtFT5<sub>MM</sub>, a tryptophan residue is present at the corresponding glycine position (G170W) so we designed overexpression constructs with reciprocal amino acid substitutions (namely *NtFT5*<sub>G170W</sub> and *NtFT5*<sub>MM W170G</sub>) and analyzed these in transgenic SR1Δ*NtFT5* lines (Supplementary Fig. S5A). We regenerated three independent 35S:*NtFT5*<sub>G170W</sub> and 35S:*NtFT5*<sub>MM W170G</sub> transgenic lines each and investigated these lines in the T<sub>1</sub> generation compared to 35S:*NtFT5* and 35S:*NtFT5*<sub>MM</sub> transgenic lines in more detail (Fig. 4F,G and Supplementary Fig. S5B,C). We cultivated three independent transgenic lines each (n = 6–10) and one SR1 vector control line (n = 10) in the greenhouse under LD conditions and documented the flowering phenotype for one representative transgenic line each in comparison to a vector control (Fig. 4F). The *NtFT5*<sub>G170W</sub> and *NtFT5*<sub>MM W170G</sub> mRNA levels were much higher than the vector control and were in the range of the *NtFT5*<sub>MM</sub> mRNA overexpression levels (Supplementary Fig. S5B). However, *NtFT5*<sub>MM W170G</sub>//SR1Δ*NtFT5* lines flowered significantly earlier and the number of leaves was significantly lower compared to the 35S:*NtFT5*<sub>MM</sub>//SR1Δ*NtFT5* lines (Fig. 4G and Supplementary Fig. S5C). Accordingly, 35S:*NtFT5*<sub>G170W</sub>//SR1Δ*NtFT5* lines flowered later than 35S:*NtFT5*//SR1Δ*NtFT5* overexpressing plants, resulting in the production of significantly more leaves and significantly more days until flowering (Fig. 4G and Supplementary Fig. S5C). This indicates that both substitutions at position 170, tryptophan to glycine (in NtFT5<sub>MM W170G</sub>) and glycine to tryptophan (in NtFT5<sub>G170W</sub>), produced intermediate-strength floral inducers stronger than NtFT5<sub>MM</sub> but weaker than NtFT5.

## Discussion

Many plant species initiate the developmental switch from vegetative to reproductive growth under specific photoperiodic conditions. Although tobacco is a day-neutral species, floral initiation depends on the photoperiod-dependent expression of various *FT* genes (Harig *et al.*, 2012; Beinecke *et al.*, 2018). Previous studies have mostly focused on *FT* genes expressed under SD conditions, but the

recently identified *NtFT5* gene is expressed under both SD and LD conditions. *NtFT5* has been characterized as the major floral activator under LD conditions in tobacco cultivar SR1, making this protein an interesting candidate for further analysis in the SD cultivar MM (Beinecke *et al.*, 2018; Schmidt *et al.*, 2020).

Comparative expression analysis revealed that *NtFT5* is expressed at similar levels in cultivar MM and the day-neutral cultivar Hicks, which excludes the possibility that the LD-specific non-flowering phenotype of MM is caused by the silencing of this locus. We also found that the *NtFT5* coding sequence was identical in cultivars Hicks and SR1, and that the overexpression of this sequence in MM permitted flowering under LD conditions, suggesting that the *NtFT5*<sub>MM</sub> protein is functionally impaired. Further analysis revealed a 2-bp deletion near the 3' end of the *NtFT5*<sub>MM</sub> gene causing a frameshift that introduced a premature termination codon. The resulting *NtFT5*<sub>MM</sub> protein lacks the six amino acids normally found at the C-terminus. Because the *NtFT5*<sub>MM</sub> protein could be detected by western blot and floral structures at the SAM of SR1Δ*NtFT5* scions grafted onto 35S:*NtFT5*<sub>MM</sub>//SR1Δ*NtFT5* stocks were induced, we concluded that neither protein stability nor transport is affected by the C-terminal truncation of *NtFT5*<sub>MM</sub>. We tested the ability of *NtFT5* and *NtFT5*<sub>MM</sub> to induce flowering under LD conditions by expressing each variant in SR1Δ*NtFT5* plants. As expected, *NtFT5* overexpression resulted in a profound early flowering phenotype, as described for transgenic tobacco lines overexpressing other floral activators such as *NtFT4* and *AtFT* (Harig *et al.*, 2012; Beinecke *et al.*, 2018). In contrast, the overexpression of *NtFT5*<sub>MM</sub> caused plants to flower at a later developmental stage, even though *NtFT5*<sub>MM</sub> mRNA levels were higher than *NtFT5* mRNA levels in the corresponding transgenic SR1Δ*NtFT5* plants. The late-flowering behavior of transgenic 35S:*NtFT5*<sub>MM</sub>//SR1Δ*NtFT5* compared with the normal flowering time of SR1 vector control lines (expressing *NtFT5* at the endogenous level) showed that a fully functional endogenous *NtFT5* gene can more effectively induce flowering than the strong overexpression of *NtFT5*<sub>MM</sub>. This confirms that the altered C-terminus of *NtFT5*<sub>MM</sub> weakens its function as a floral activator.

As previously shown in Arabidopsis and rice, FT proteins interact with FD proteins to regulate flower development (Abe *et al.*, 2005; Wigge *et al.*, 2005; Taoka *et al.*, 2011). Similarly, the tobacco FT proteins interact with three FD proteins, and it was therefore important to determine whether the truncated *NtFT5*<sub>MM</sub> protein retained this ability (Beinecke *et al.*, 2018). Our BiFC experiments showed that both *NtFT5* and *NtFT5*<sub>MM</sub> interacted with all three tobacco FD proteins, but mcBiFC experiments revealed that *NtFD1* may preferably associate with *NtFT5* because it is more competitive than *NtFT5*<sub>MM</sub> at the protein level. It is widely accepted that 14-3-3 proteins mediate interactions between FT and FD (Pnueli *et al.*, 2001; Ho and Weigel, 2014; Taoka *et al.*, 2011; Collani *et al.*, 2019; Zuo *et al.*, 2021) and the amino acid residues critical for this interaction are highly conserved in FT-like proteins from angiosperms and are located upstream of the 2-bp deletion in *NtFT5*<sub>MM</sub>. However, our results suggest

that additional amino acids at the NtFT5 C-terminus are required for proper interaction with NtFD proteins. Furthermore, the C-terminal residues of NtFT5 fulfil an important role in floral activation as shown by the late flowering phenotype of AtFT mutants with the substitution G171E (Koornneef *et al.*, 1991; Kardailsky *et al.*, 1999; Kobayashi *et al.*, 1999). In NtFT5<sub>MM</sub>, the corresponding glycine residue is replaced with tryptophan (G170W), suggesting that the altered C-terminus of NtFT5<sub>MM</sub> may influence its regulatory activity or binding affinity for NtFD1. Indeed, replacing the tryptophan residue in NtFT5<sub>MM</sub> with glycine in transgenic 35S:NtFT5<sub>MM</sub> W170G//SR1ΔNtFT5 lines restored wild-type flowering behavior, whereas mutating the glycine residue to tryptophan in transgenic 35S:NtFT5<sub>G170W</sub>//SR1ΔNtFT5 lines abolished the profound early flowering phenotype. Furthermore, experiments in Arabidopsis have shown that the overexpression of a truncated FT gene yielding a protein lacking the last seven amino acids (FTΔ168) causes a late flowering phenotype in *ft-10* mutant plants compared to *ft-10* plants overexpressing functional FT (Kim *et al.*, 2016). FTΔ168 and NtFT5<sub>MM</sub> both lack the glycine residue at position 170/171, which is strongly conserved in the FT-like family. Interestingly, members of the TFL1-like family of floral repressors have a highly conserved C-terminus that lacks the glycine residue at the corresponding position (Supplementary Fig. S6). However, the glycine residue is present in both floral activators and floral inhibitors of the FT-like family, so its precise function in terms of floral regulation remains unclear. Additional amino acid residues that are necessary for the regulatory activity of FT proteins have been described (Hanzawa *et al.*, 2005; Ahn *et al.*, 2006; Ho and Weigel, 2014) and it seems likely that the presence of all these conserved residues is required for the correct function of FT-like floral activators. However, further studies are needed to understand in detail the role of the C-terminus of FT in flower development. MM plants can flower under SD conditions, indicating that the high levels of mRNA encoding the strong activator NtFT4 and the weak activator NtFT5<sub>MM</sub> under SD conditions are sufficient to induce flowering, whereas the low levels of both transcripts under LD conditions are not. Only the strong overexpression of NtFT5<sub>MM</sub> can overcome the non-flowering phenotype in SR1ΔNtFT5 plants. However, even strong overexpression can only complement the non-flowering phenotype to a certain extent, given that the transgenic 35S:NtFT5<sub>MM</sub>//SR1ΔNtFT5 plants still induce flower development at a later time point compared to the SR1 vector control. Under SD conditions, the MM plants flowered one week later than the day-neutral cultivar Hicks. RNA interference (RNAi) experiments in tobacco SR1 plants have shown that the silencing of NtFT4 or NtFT5 can delay flowering, but the effect was stronger for NtFT5 (Beinecke *et al.*, 2018). This suggests that NtFT5 has a stronger effect than NtFT4 in flower development and explains the delayed flowering phenotype of cultivar MM compared to day-neutral cultivar Hicks under SD conditions, given that the latter still produces a functional NtFT5 protein. Taken together, our results demonstrate that NtFT5<sub>MM</sub> acts as a weak floral activator even when strongly overexpressed, which may reflect its lower binding affinity for NtFD. Under LD conditions, the

typical levels of *NtFT5<sub>MM</sub>* mRNA are insufficient for floral induction, but under SD conditions floral induction in MM plants is facilitated by the high levels of *NtFT4* mRNA, resulting in the switch from vegetative to reproductive growth. Thus, our results provide insight into the SD-specific flowering behavior of MM, a tobacco cultivar that was instrumental in the discovery of photoperiodism and was first described a century ago.

# **Supplementary data**

**Fig. S1.** Detection of *NtFT7* in tobacco (*N. tabacum*) cultivars Maryland Mammoth (MM), Hicks and SR1, and *N. sylvestris*.

**Fig. S2.** BiFC analysis of NtFT5<sub>R61G</sub>, NtFT5<sub>R129A</sub>, NtFT5<sub>FNC\*</sub> and AtFT with NtFD1 as well as NtFD3 and NtFD4 with NtFT5<sub>MM</sub>, NtFT5, NtFT5<sub>FN\*</sub> and AtFT.

**Fig. S3.** Western blot analysis of BiFC experiments with different mRFP-FT fusion proteins and NtFD1.

**Fig. S4.** Multicolor BiFC assay.

**Figure S5.** Functional characterization of NtFT5<sub>MM W170G</sub> and NtFT5<sub>G170W</sub> mutants.

**Figure S6.** Amino acid sequence alignment of FT-like and TFL-like proteins.

**Table S1.** List of oligonucleotides used in this study.

**Methods S1.** Cloning procedures for BiFC.

# **Acknowledgements**

We acknowledge the technical support of Michael Lahme, Christiane Fischer, Heike Hinte, Sascha Ahrens and Andreas Wagner.

# **Author contributions**

LG, AK, DP, GAN: conceptualization, project administration and supervision; MMZ, LG, AK, AS, JM: investigation; DRW: formal analysis; MMZ, LG: visualization; MMZ, LG, AK, RMT, GAN: writing

# **Conflicts of interest**

The authors declare no conflict of interest.

# **Funding**

This work was partially financed by grants from the Fraunhofer Society.

# **Data availability**

All data supporting the findings of this study are available within the manuscript and its supplementary materials.



# References

- Abe M, Kobayashi Y, Yamamoto S, Daimon Y, Yamaguchi A, Ikeda Y, Ichinoki H, Notaguchi M, Goto K and Araki T.** 2005. FD, a bZIP Protein Mediating Signals from the Floral Pathway Integrator FT at the Shoot Apex. *Science* 309, 1052–1056.
- Abelenda JA, Cruz-Oró E, Franco-Zorrilla JM, Prat S.** 2016. Potato StCONSTANS-like1 Suppresses Storage Organ Formation by Directly Activating the FT-like StSP5G Repressor. *Current Biology* 26, 872–881.
- Ahn JH, Miller D, Winter VJ, Banfield MJ, Lee JH, Yoo SY, Henz SR, Brady RL and Weigel D.** 2006. A divergent external loop confers antagonistic activity on floral regulators FT and TFL1. *EMBO Journal*, 25: 605–614.
- Amasino RM.** 2013. My favourite flowering image: Maryland Mammoth tobacco. *Journal of Experimental Botany* 64, 5817–5818.
- Banfield MJ, Barker JJ, Perry C and Brady RL.** 1998. Function from structure? The crystal structure of human phosphatidylethanolamine-binding protein suggests a role in membrane signal transduction. *Structure*, 6: 1245–1254.
- Beinecke FA, Grundmann L, Wiedmann DR, Schmidt FJ, Caesar AS, Zimmermann M, Lahme M, Twyman RM, Prüfer D and Noll GA.** 2018. The FT/FD-dependent initiation of flowering under long-day conditions in the day-neutral species *Nicotiana tabacum* originates from the facultative short-day ancestor *Nicotiana tomentosiformis*. *Plant Journal*, 96: 329–342.
- Bevan M.** 1984. Binary *Agrobacterium* vectors for plant transformation. *Nucleic Acids Research*, 12: 8711–8721.
- Bradley D, Carpenter R, Copsey L, Vincent C, Rothstein S and Coen E.** 1996. Control of inflorescence architecture in *Antirrhinum*. *Nature*, 379: 791–797.
- Cao K, Cui L, Zhou X, Ye L, Zou Z and Deng S.** 2015. Four Tomato FLOWERING LOCUS T-Like Proteins Act Antagonistically to Regulate Floral Initiation. *Frontiers in Plant Science*, 6.
- Collani S, Neumann M, Yant L, Schmid M.** 2019. FT Modulates Genome-Wide DNA-Binding of the bZIP Transcription Factor FD. *Plant Physiology* 180, 367–380.
- Corbesier L, Vincent C and Jang S** 2007. FT Protein Movement Contributes to Long-Distance Signaling in Floral Induction of *Arabidopsis*. *Science*, 316: 1030–1033.
- Garner WW and Allard HA.** 1920. Effect of the relative length of day and night and other factors of the environment on growth and reproduction in plants. *Journal of Agricultural Research*, 18: 553–606.
- Hamilton CM, Frary A, Lewis C and Tanksley SD.** 1996. Stable transfer of intact high molecular weight DNA into plant chromosomes. *PNAS USA*, 93: 9975–9979.
- Hanzawa Y, Money T and Bradley D.** 2005. A single amino acid converts a repressor to an activator of flowering. *PNAS USA*, 102: 7748–7753.
- Harig L, Beinecke FA, Oltmanns J, Muth J, Müller O, Rüping B, Twyman RM, Fischer R, Prüfer D and Noll GA.** 2012. Proteins from the FLOWERING LOCUS T-like subclade of the PEBP family act antagonistically to regulate floral initiation in tobacco. *Plant Journal*, 72: 908–921.
- Ho WWH, Weigel D.** 2014. Structural features determining flower-promoting activity of *Arabidopsis* FLOWERING LOCUS T. *The Plant Cell* 26, 552–564.
- Hoekema A, Hirsch PR, Hooykaas PJJ and Schilperoort RA.** 1983. A binary plant vector strategy based on separation of vir- and T-region of the *Agrobacterium tumefaciens* Ti-plasmid. *Nature*, 303: 179–180.
- Horsch RB, Fry JE, Hoffmann NL, Eichholtz D, Rogers SG and Fraley RT.** 1985. A Simple and General Method for Transferring Genes into Plants. *Science*, 227: 1229–1231.
- Kardailsky I, Shukla VK, Ahn JH, Dagenais N, Christensen SK, Nguyen JT, Chory J, Harrison MJ and Weigel D.** 1999. Activation Tagging of the Floral Inducer FT. *Science*, 286: 1962–1965.
- Karlgrén A, Gyllenstrand N, Källman T, Sundström JF, Moore D, Lascoux M and Lagercrantz U.** 2011. Evolution of the PEBP gene family in plants: functional diversification in seed plant evolution. *Plant Physiology*, 156: 1967–1977.

- Kim S-J, Yoo SJ, Hong SM, Ahn JH, Moon S and Jung HS.** 2016. Post-Translational Regulation of FLOWERING LOCUS T Protein in Arabidopsis. *Molecular Plant*, 9: 308–311.
- Kobayashi Y, Kaya H, Goto K, Iwabuchi M and Araki T.** 1999. A Pair of Related Genes with Antagonistic Roles in Mediating Flowering Signals. *Science*, 286: 1960–1962.
- Koornneef M, Hanhart CJ and van der Veen JH.** 1991. A genetic and physiological analysis of late flowering mutants in Arabidopsis thaliana. *Molecular and General Genetics*, 229: 57–66.
- Lifschitz E, Eviatar T, Rozman A, Shalit A, Goldshmidt A, Amsellem Z, Alvarez JP and Eshed Y.** 2006. The tomato *FT* ortholog triggers systemic signals that regulate growth and flowering and substitute for diverse environmental stimuli. *PNAS USA*, 103: 6398–6403.
- Livak KJ and Schmittgen TD.** 2001. Analysis of Relative Gene Expression Data Using Real-Time Quantitative PCR and the  $2^{-\Delta\Delta C_T}$  Method. *Methods*, 25: 402–408.
- Molinero-Rosales N, Latorre A, Jamilena M and Lozano R.** 2004. SINGLE FLOWER TRUSS regulates the transition and maintenance of flowering in tomato. *Planta*, 218: 427–434.
- Müller B, Noll GA, Ernst AM, Rüping B, Groscurth S, Twyman RM, Kawchuk LM and Prüfer D.** 2010. Recombinant artificial forisomes provide ample quantities of smart biomaterials for use in technical devices. *Applied Microbiology and Biotechnology*, 88: 689–698.
- Murashige T and Skoog F.** 1962. A Revised Medium for Rapid Growth and Bio Assays with Tobacco Tissue Cultures. *Physiologia Plantarum*, 15: 473–497.
- Pin PA, Benlloch R, Bonnet D, Wremmerth-Weich E, Kraft T, Gielen JLL and Nilsson O.** 2010. An Antagonistic Pair of *FT* Homologs Mediates the Control of Flowering Time in Sugar Beet. *Science*, 330: 1397–1400.
- Pnueli L, Gutfinger T, Hareven D et al.** 2001. Tomato SP-interacting proteins define a conserved signaling system that regulates shoot architecture and flowering. *The Plant Cell* 13, 2687–2702.
- Post J, Eisenreich W, Huber C, Twyman RM, Prüfer D, Schulze Gronover C.** 2014. Establishment of an ex vivo laticifer cell suspension culture from *Taraxacum brevicorniculatum* as a production system for cis-isoprene. *Journal of Molecular Catalysis B: Enzymatic* 103, 85–93.
- Schmidt FJ, Zimmermann MM, Wiedmann DR, Lichtenauer S, Grundmann L, Muth J, Twyman RM, Prüfer D, and Noll GA.** 2020.. The Major Floral Promoter NtFT5 in Tobacco *Nicotiana tabacum*. Is a Promising Target for Crop Improvement. *Frontiers in Plant Sciences*, 10: 1–16.
- Schmidt GW and Delaney SK.** 2010. Stable internal reference genes for normalization of real-time RT-PCR in tobacco *Nicotiana tabacum*. during development and abiotic stress. *Molecular Genetics and Genomics*, 283: 233–241.
- Schoentgen F and Jollès P.** 1995. From structure to function: possible biological roles of a new widespread protein family binding hydrophobic ligands and displaying a nucleotide binding site. *FEBS Letter*, 369: 22–26.
- Smith SM, McDaniel CN.** 1992. The Maryland mammoth allele and rooting both perturb the fate of florally determined apices in *Nicotiana tabacum*. *Developmental Biology* 153, 176–184.
- Tamaki S, Matsuo S, Wong HL, Yokoi S and Shimamoto K.** 2007. Hd3a Protein Is a Mobile Flowering Signal in Rice. *Science*, 316: 1033–1036.
- Taoka K, Ohki I, Tsuji H et al.** 2011. 14-3-3 proteins act as intracellular receptors for rice Hd3a florigen. *Nature*, 476: 332–335.
- Töpfer R, Matzeit V, Gronenborn B, Schell J and Steinbiss H-H.** 1987. A set of plant expression vectors for transcriptional and translational fusions. *Nucleic Acids Research*, 15: 5890.
- Turck F, Fornara F, and Coupland G.** 2008. Regulation and Identity of Florigen: FLOWERING LOCUS T Moves Center Stage. *Annual Review of Plant Biology* 59: 573-594
- Voinnet O, Rivas S, Mestre P, and Baulcombe D.** 2003. An enhanced transient expression system in plants based on suppression of gene silencing by the p19 protein of tomato bushy stunt virus. *Plant Journal* 33: 949–956.
- Walter M, Chaban C, Schütze K, Batistic O, Weckermann K, Näke C, Blazevic D, Grafen C, Schumacher K, Oecking C, Harter K and Kudla J.** 2004. Visualization of protein interactions in living plant cells using bimolecular fluorescence complementation. *Plant Journal* 40: 428–438.

- Wang G, Li Y, Gao J, Zhao M, Xia Q, Wang P, Wu L and Gao Y.** 2018. Isolation and functional characterization of a novel FLOWERING LOCUS T homolog *NtFT5*. in *Nicotiana tabacum*. Journal of Plant Physiology, 231: 393–401.
- Wickland DP and Hanzawa Y.** 2015. The *FLOWERING LOCUS T*/*TERMINAL FLOWER 1* Gene Family: Functional Evolution and Molecular Mechanisms. Molecular Plant, 8: 983–997.
- Wigge PA, Kim MC, Jaeger KE, Busch W, Schmid M, Lohmann JU and Weigel D.** 2005. Integration of Spatial and Temporal Information During Floral Induction in *Arabidopsis*. Science, 309: 1056–1059.
- Zuo X, Wang S, Xiang W et al.** 2021. Genome-wide identification of the 14-3-3 gene family and its participation in floral transition by interacting with TFL1/FT in apple. BMC genomics 22, 41.

# Figures

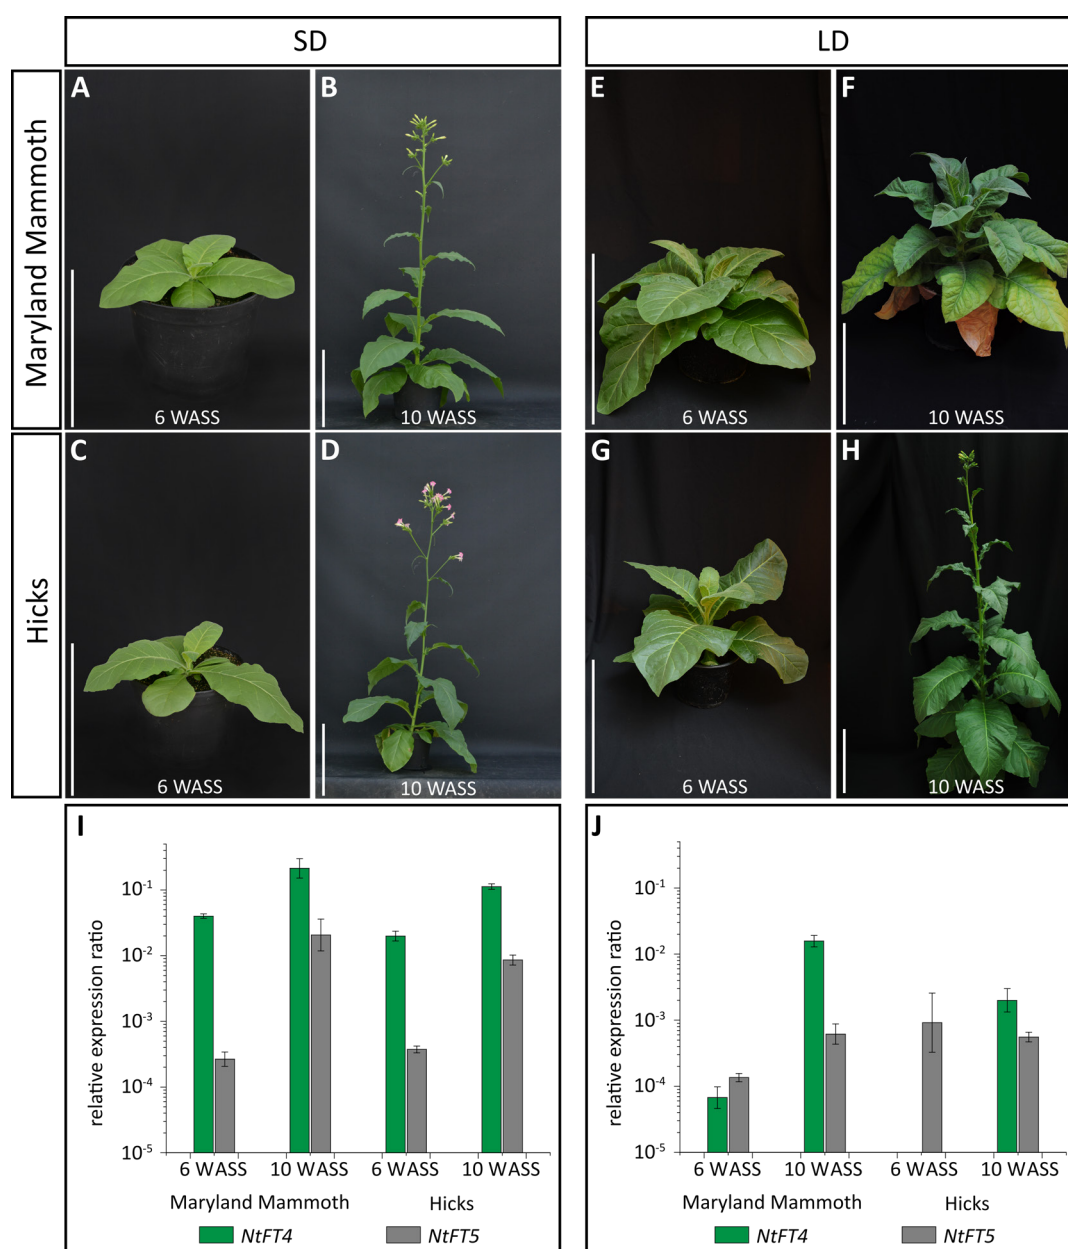

**Fig. 1. Phenotype and *NtFT4*/*NtFT5* gene expression in tobacco cultivars Maryland Mammoth (MM) and Hicks under short-day (SD) and long-day (LD) conditions.**

(A–D) Under SD conditions, flower development was observed both for (A,B) cv. MM and (C,D) cv. Hicks. (E–H) Under LD conditions, (E,F) no flower development was observed in cv. MM, but (G,H) flowers were produced by cv. Hicks. Pictures were taken 6 and 10 weeks after seed sowing (WASS). Scale bars = 30 cm. (I,J) *NtFT4* and *NtFT5* expression was analyzed by qPCR in three biological replicates per time point. Each biological replicate comprised pooled medial leaf tissue of three individual plants. Values were normalized to the reference gene *NtEF-1α*. Error bars represent the standard error of the mean of three biological replicates. *NtFT4* is predominantly expressed under SD conditions with rising mRNA levels during the reproductive phase in both cultivars. Under LD conditions, *NtFT4* mRNA levels were low (MM) or not detectable (Hicks) 6 WASS but increased in both cultivars 10 WASS. *NtFT5* expression increased with the initiation of floral development in both cultivars under SD conditions. Under LD conditions, the expression of *NtFT5* was higher in Hicks than in MM 6 WASS, but mRNA levels were similar in both cultivars 10 WASS.

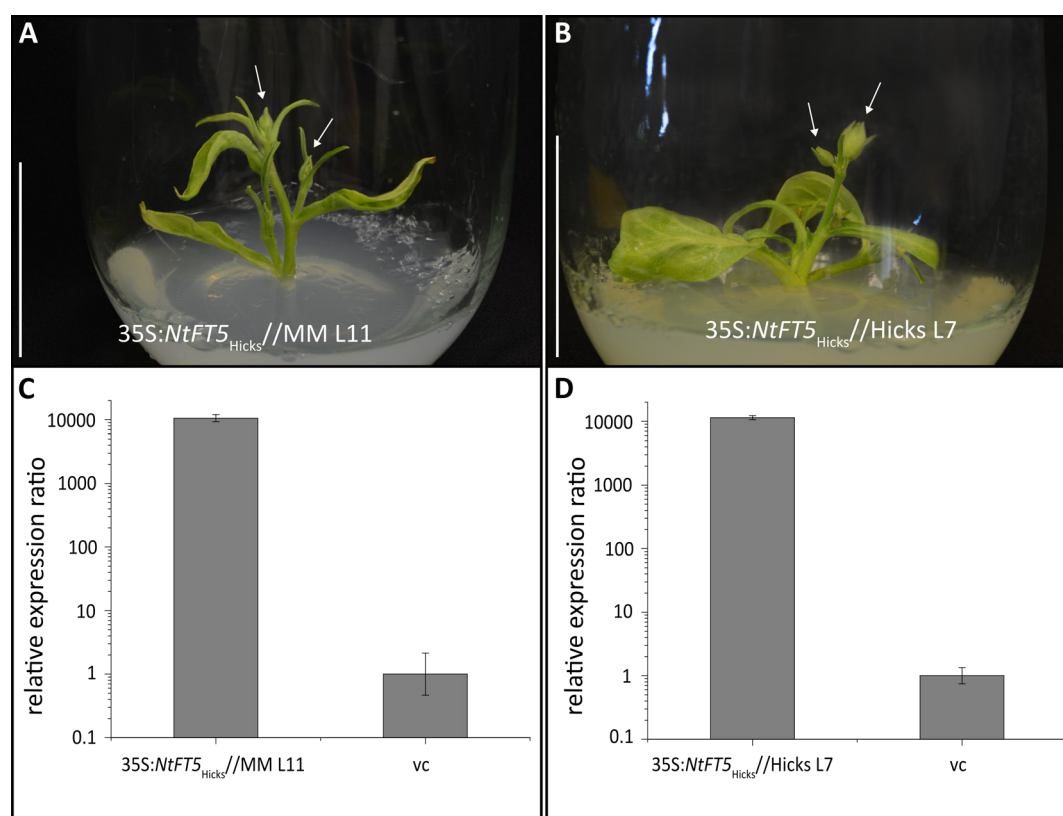

**Fig. 2. Overexpression of *NtFT5*<sub>Hicks</sub> leads to early flowering in tobacco cultivars Maryland Mammoth (MM) and Hicks.**

(A,B) Constitutive overexpression of *NtFT5*<sub>Hicks</sub> causes early flowering in tobacco (A) cv. MM and (B) cv. Hicks. Pictures were taken in tissue culture. Arrows indicate the formation of buds. Scale bars = 5 cm.

(C,D) *NtFT5*<sub>Hicks</sub> expression was analyzed by qPCR using samples isolated from entire plants harvested at the tissue culture stage. Values were normalized to the reference gene *NtEF-1α*. Expression in the vector control (vc) was set to 1 and error bars represent the combined standard deviation of target and reference gene technical replicates. *NtFT5*<sub>Hicks</sub> mRNA levels were >10<sup>4</sup>-fold higher in MM L11 and Hicks L7 transgenic plants than the corresponding vector controls.

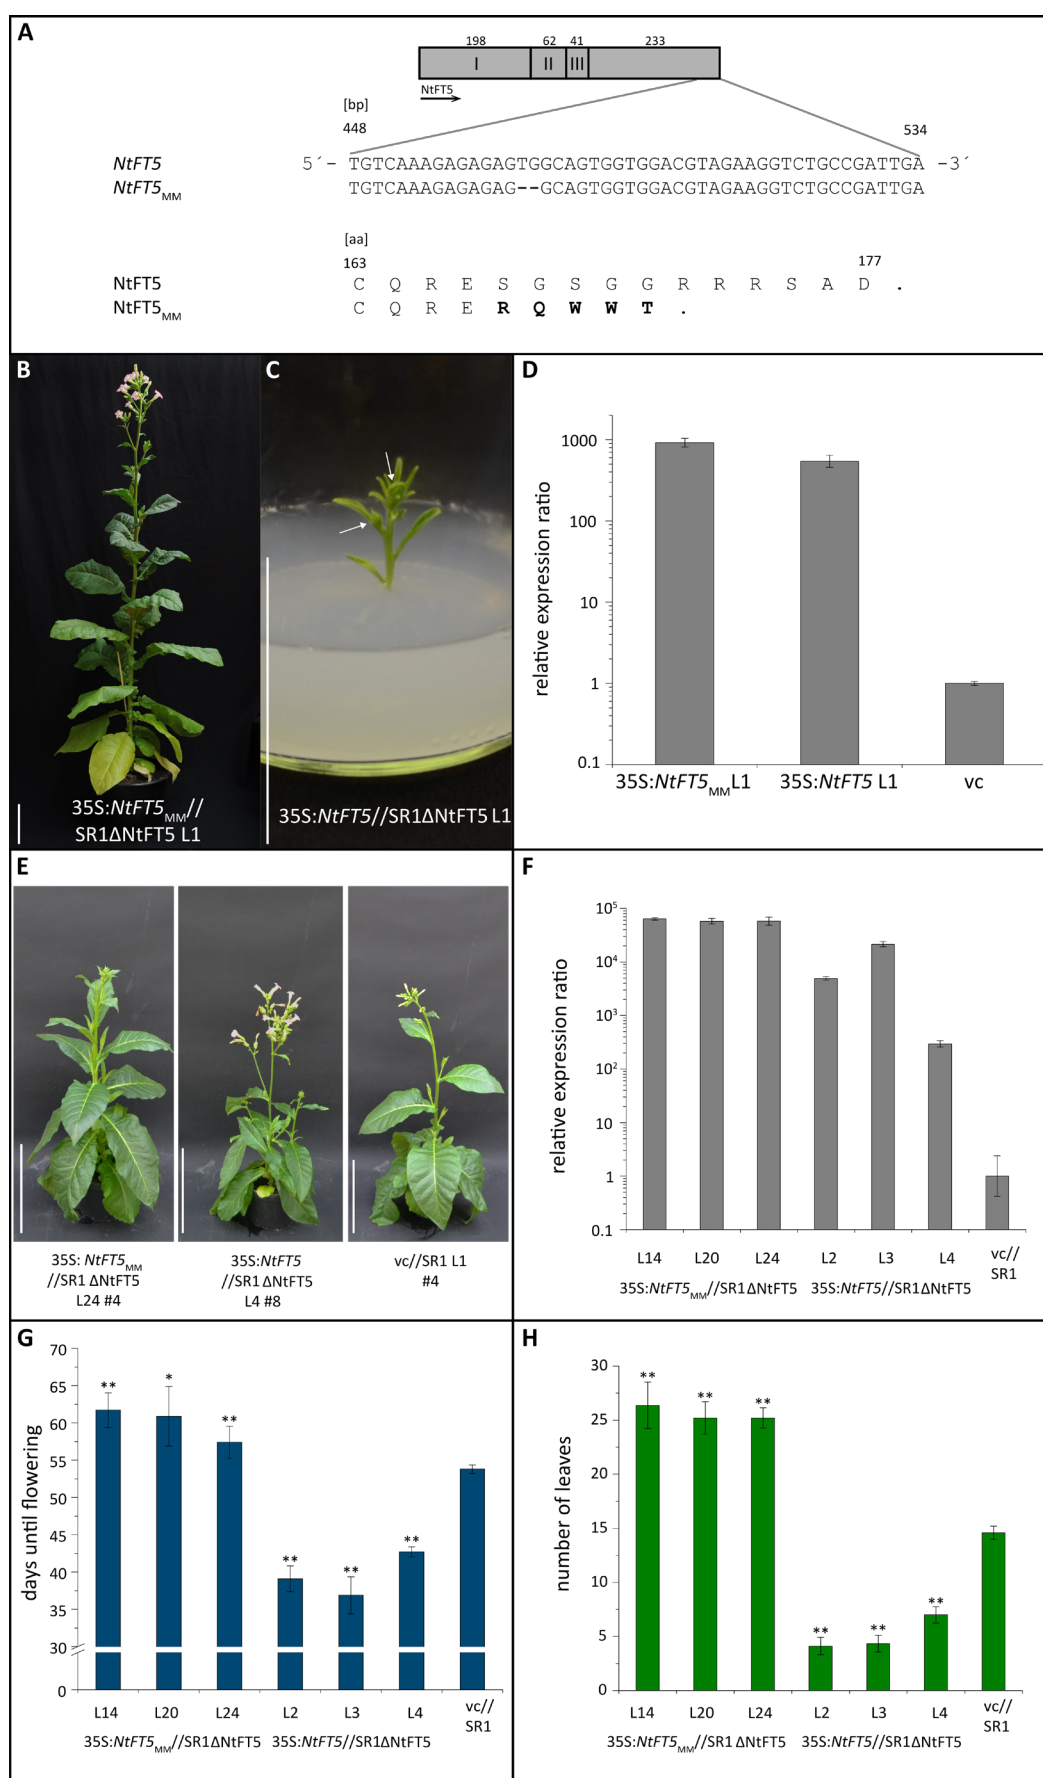

**Fig. 3. Phenotypic and molecular analysis of *NtFT5* and *NtFT5<sub>MM</sub>* overexpression in *SR1ΔNtFT5* plants.** (A) Exon structure of *NtFT5* and sequence alignment of the 3' end of the coding sequence showing a 2-bp deletion 29 bp upstream of the typical stop codon in *NtFT5<sub>MM</sub>* resulting in a truncated amino acid sequence.



(B) Constitutive overexpression of *NtFT5<sub>MM</sub>* in SR1Δ*NtFT5* plants led to flower development in the greenhouse when the plants reached approximately 1.2 m in height. Scale bar = 10 cm.

(C) In contrast, *NtFT5* overexpression in SR1Δ*NtFT5* plants caused a profound early flowering phenotype in tissue culture. Arrows indicate the formation of buds. Scale bar = 10 cm.

(D) *NtFT5<sub>MM</sub>* and *NtFT5* expression was analyzed by qPCR using samples isolated from leaf material (*NtFT5<sub>MM</sub>*) and the whole plant shoot for *NtFT5* and vector control (vc), both harvested in tissue culture. The values were normalized to the reference gene *NtEF-1α*. Expression in the vector control was set to 1 and error bars represent the combined standard deviation of the target and reference gene technical replicates. *NtFT5<sub>MM</sub>* mRNA (920-fold higher than vector control) and *NtFT5* mRNA (540-fold higher than vector control) levels strongly increased in both transgenic lines.

(E) Constitutive overexpression of *NtFT5<sub>MM</sub>* in the non-flowering SR1Δ*NtFT5* background caused delayed flowering compared to the wild-type SR1 vector control (vc) under LD conditions (T<sub>1</sub> generation), indicating only partial complementation, whereas overexpression of *NtFT5* induced early flowering in transgenic plants. Scale bars = 30 cm.

(F) *NtFT5<sub>MM</sub>* and *NtFT5* expression was analyzed by qPCR using samples isolated from five pooled seedlings. The values were normalized to the reference gene *NtEF-1α*. Expression in the vector control was set to 1 and error bars represent the combined standard deviation of the target and reference gene technical replicates. The levels of *NtFT5<sub>MM</sub>* mRNA were higher in all lines compared to the vector control, ranging from 58,000-fold (L20 and L24) to 64,000-fold (L14). *NtFT5* transcript levels ranged from 300-fold (L4) to 22,000-fold (L3) higher than the vector control.

(G) The number of days until flowering was defined as the period between seed sowing and the day the first flower opened. Strong overexpression of *NtFT5<sub>MM</sub>* in SR1Δ*NtFT5* plants resulted in delayed flowering in all transgenic lines compared to the SR1 vector control. Plants overexpressing *NtFT5* showed profound early flowering phenotypes compared the SR1 vector control.

(H) The total number of leaves was determined when the first flower had opened. All lines of SR1Δ*NtFT5* plants overexpressing *NtFT5<sub>MM</sub>* produced more leaves and all lines overexpressing *NtFT5* produced fewer leaves than the SR1 vector control.

(G–H) Mean values are shown for three 35S:*NtFT5<sub>MM</sub>*//SR1Δ*NtFT5* lines (L14 and L24, n = 10; L20, n = 8), three 35S:*NtFT5<sub>MM</sub>*//SR1Δ*NtFT5* lines (L2 and L3, n = 9; L4, n = 10) and one vector control line (n = 10) with error bars representing ± 95% confidence intervals. Normal distribution was confirmed by applying the Kolmogorov-Smirnov test. Statistical significance was determined using a pairwise Welch's *t*-test with Bonferroni-Holm correction (\*\**P* < 0.01; \**P* < 0.05).

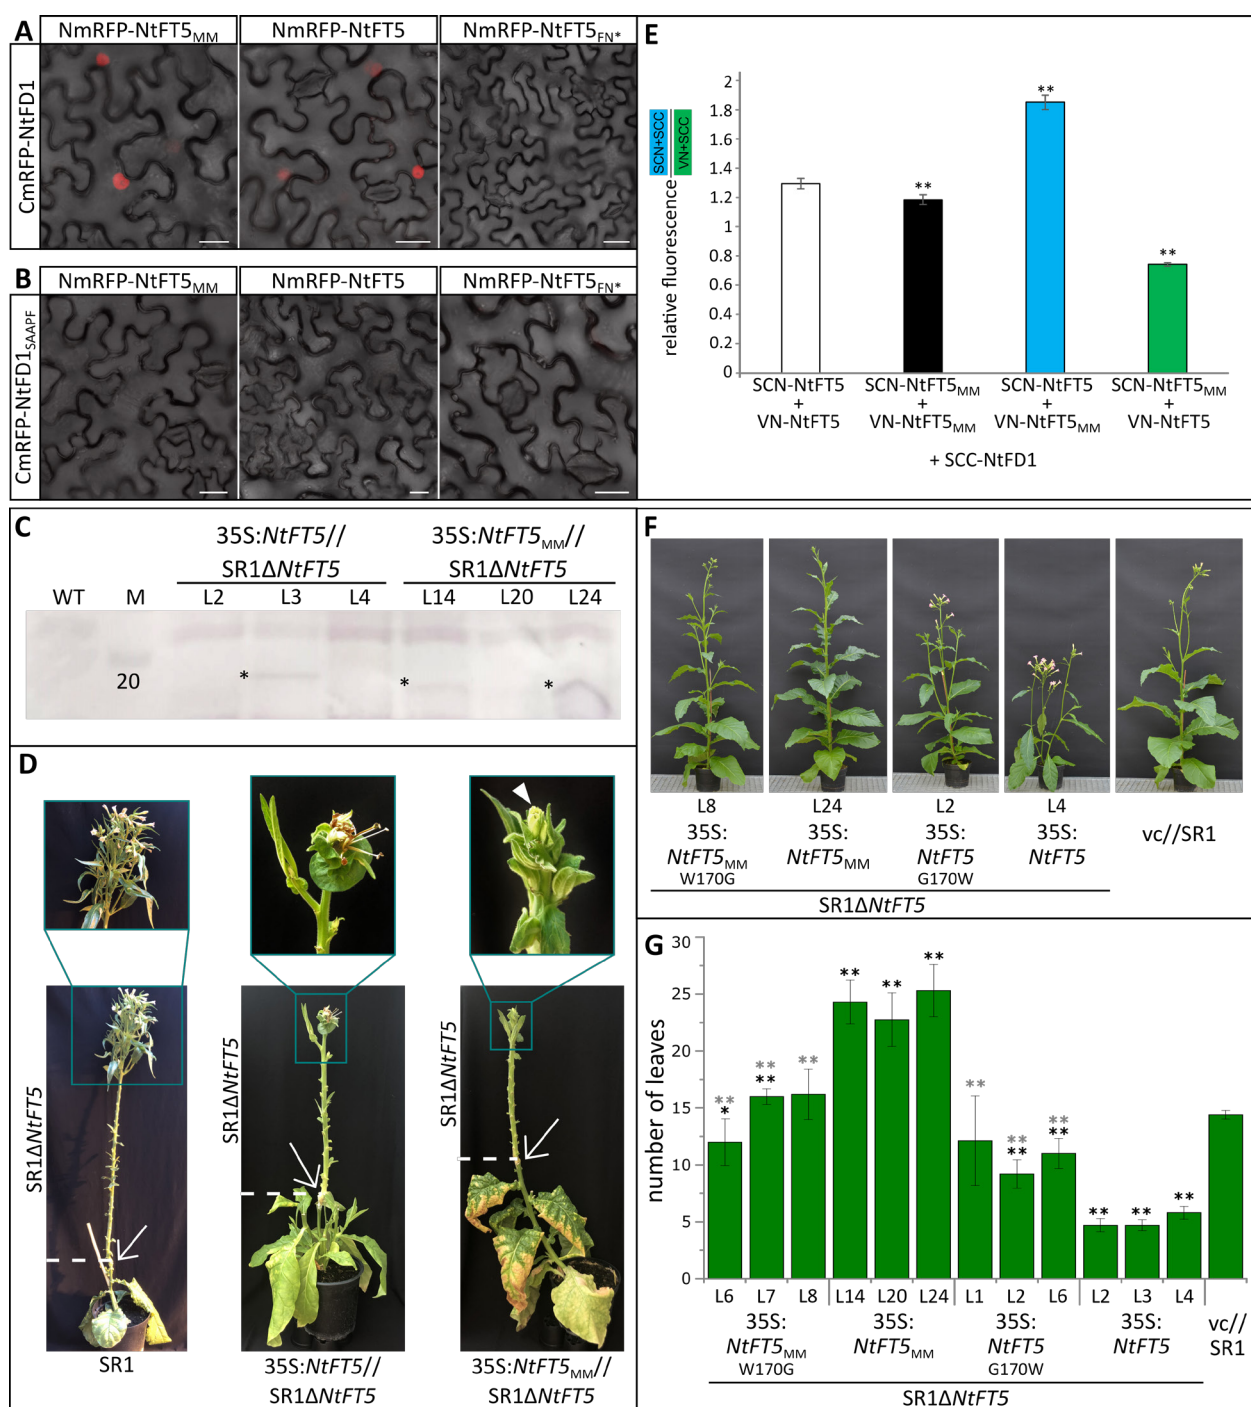

**Fig. 4. Functional characterization of NtFT5<sub>MM</sub> and NtFT5.**

(A,B) BiFC analysis revealed that NtFD1 (A) interacts with NtFT5<sub>MM</sub> and NtFT5 in *N. benthamiana* leaf epidermal cells, whereas NtFD1<sub>SAAPF</sub> (B) does not interact with the tobacco FTs; 35S:*CmrFP-NtFD1* or 35S:*CmrFP-NtFD1*<sub>SAAPF</sub> was co-expressed with 35S:*NmRFP* fusions of NtFT5<sub>MM</sub>, NtFT5 and NtFT5<sub>FN\*</sub>. Scale bars = 25  $\mu$ m.

(C) Detection of NtFT5 and NtFT5<sub>MM</sub> proteins by western blotting. We loaded 50 mg of protein extracted from seedlings in each lane and detected the NtFT protein (\*) with an AtFT-specific primary antibody and an alkaline phosphatase-labeled secondary antibody. The Precision Plus Protein standards were used as size markers (M). (D) Grafting experiments confirming that the NtFT5 and NtFT5<sub>MM</sub> proteins are transported from wild-type (WT), 35S:NtFT5 and 35S:NtFT5<sub>MM</sub> stock to the SAM to induce flower-like structures on SR1ΔNtFT5 scions. Pictures were taken when scions flowered. Emerging leaves on the scion and axillary shoots on the stock were removed regularly to enhance the source-sink gradient.

(E) In mBiFC assays, NtFD1 preferentially associated with NtFT5 rather than NtFT5<sub>MM</sub>. T-DNAs carrying two CaMV 35S cassettes encoding combinations of SCN and VN fusion proteins were introduced into *N. benthamiana* leaf epidermal cells together with a separate T-DNA containing a 35S:*SCC-NtFD1* construct. SCN+SCC and VN+SCC

fluorescence was measured in the nuclei. Values represent the SCN+SCC signal divided by the VN+SCC signal. Error bars indicate 95% confidence intervals for means. Sample sizes (left to right): 428, 341, 535, 542. SCN, N-terminal part of S(CFP)3A; VN, N-terminal part of Venus; SCC, C-terminal part of S(CFP)3A. Statistical significance was determined using a pairwise Welch's t-test with Bonferroni-Holm correction (\*\* $P < 0.01$ ).

(F) Replacing the tryptophan residue in *NtFT5<sub>MM</sub>* with glycine in transgenic 35S:*NtFT5<sub>MM</sub> W170G*//SR1Δ*NtFT5* lines resulted in a WT-like flowering phenotype, whereas mutating the glycine residue to tryptophan in transgenic 35S:*NtFT5<sub>G170W</sub>*//SR1Δ*NtFT5* lines abolished the profound early flowering phenotype under LD conditions ( $T_1$  generation). One line each is shown as an example.

(G) The number of leaves was determined when the first flower opened. All SR1Δ*NtFT5* lines overexpressing *NtFT5<sub>MM</sub>* produced more leaves and all lines overexpressing *NtFT5* produced fewer leaves than the SR1 vector control. The 35S:*NtFT5<sub>G170W</sub>*//SR1Δ*NtFT5* lines produced more leaves and the 35S:*NtFT5<sub>MM</sub> G170W*//SR1Δ*NtFT5* lines produced fewer leaves than the corresponding 35S:*NtFT5<sub>(MM)</sub>*//SR1Δ*NtFT5* lines. Mean values are shown for three 35S:*NtFT5<sub>MM</sub>*//SR1Δ*NtFT5* lines (L14 and L24,  $n = 10$ ; L20,  $n = 8$ ), three 35S:*NtFT5<sub>MM</sub>*//SR1Δ*NtFT5* lines (L2, L3 and L4,  $n = 10$ ), three 35S:*NtFT5<sub>MM</sub> W170G*//SR1Δ*NtFT5* lines (L6, L7 and L8,  $n = 10$ ), three 35S:*NtFT5<sub>G170W</sub>*//SR1Δ*NtFT5* lines (L1,  $n = 8$ ; L2  $n = 10$ ; L6,  $n = 6$ ) and one vector control line ( $n = 10$ ) with error bars representing  $\pm$  95% confidence intervals. Normal distribution was confirmed by applying the Kolmogorov-Smirnov test. Statistical significance was determined using a pairwise Welch's t-test with Bonferroni-Holm correction (\*\* $P < 0.01$ ; \* $P < 0.05$ ; black = significant compared to vc; gray = significant compared to corresponding native construct).
